# Supplementary material for: A novel bio-template route to synthesize enzyme-immobilized MOF/LDH tubular magnetic micromotors and their application in water treatment
Source: Royal Society of Chemistry journal article supplement (doi:10.1039/d3en00732d), 2024-01-01
Supplement: d3en00732d1.pdf [file d3en00732d1.pdf]

## Electronic Supplementary information

### A novel bio-template route to synthesize enzyme-immobilized MOF/LDHs tubular magnetic micromotors and their application in water treatment

Xiaohan Yang, Chenzhang Liu, Shuo Gao, Xiaolei Zhang, Ziwei Lan, Min Zuo, Jia Li<sup>1</sup>

School of Material Science and Engineering, University of Jinan, Jinan, China

#### 1. Figures

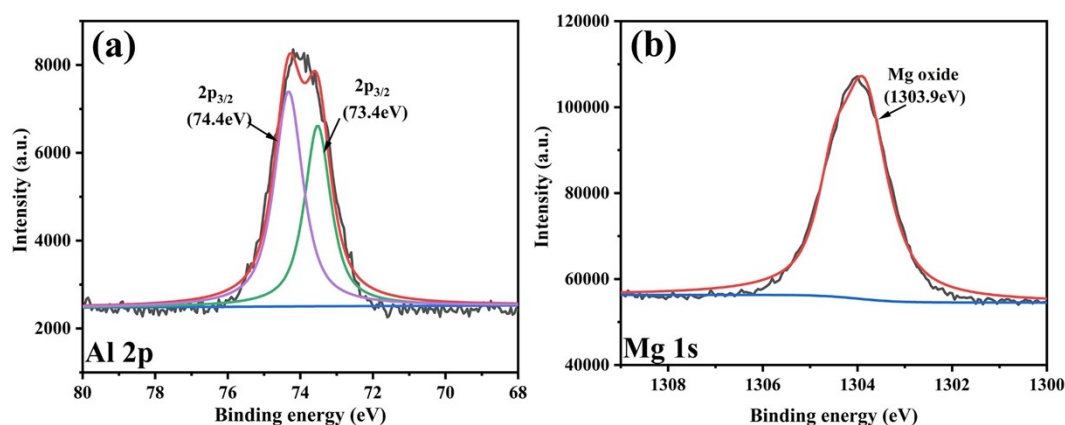

Fig. S1 XPS spectra of Al 2p (a), Mg 1s (b).

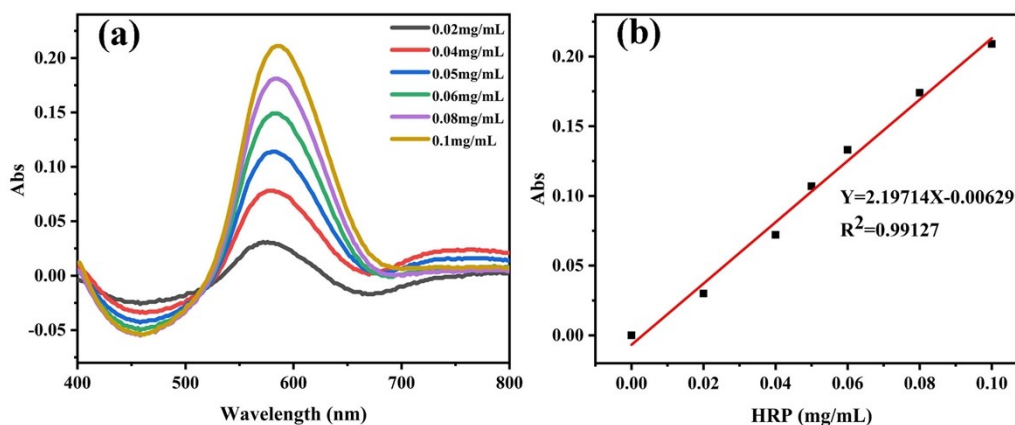

Fig. S2 UV-Vis absorption spectra of HRP enzyme tested by the Kaumas Brilliant Blue method (a) and its standard curve (b).

<sup>1</sup> Corresponding author. E-mail: mse\_lj@ujn.edu.cn (J. Li).

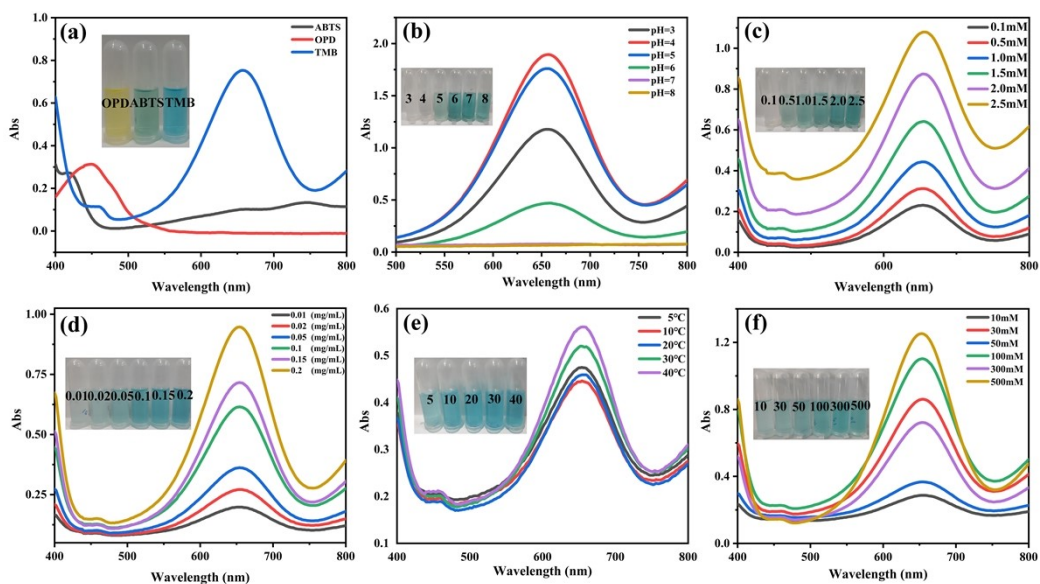

**Fig. S3** Effect of different chromogenic substrates, time (a), pH (b), catalyst concentration (c), TMB concentration (d), temperature (e) and  $H_2O_2$  concentration (f) on the chromogenic reaction system.

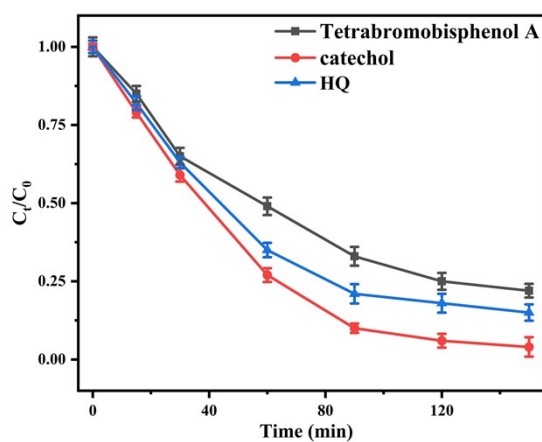

**Fig. S4** Degradation rates of catechol, hydroquinone, and tetrabromobisphenol A under the same conditions.

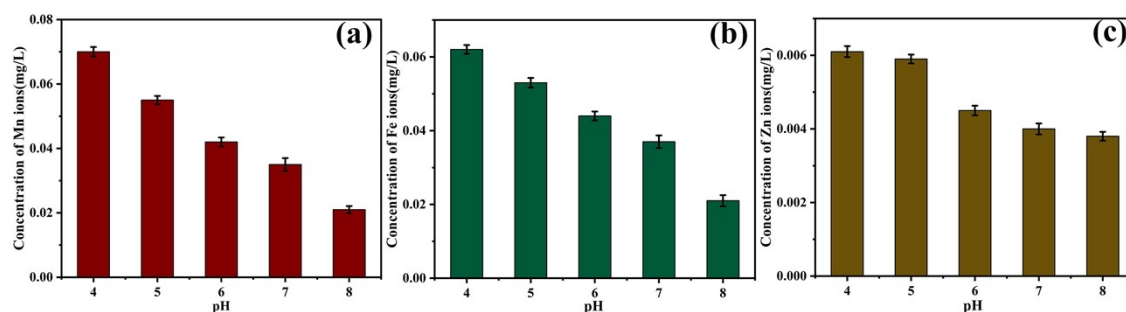

**Fig. S5** Manganese ion leaching during degradation (a), iron ion leaching (b), zinc ion leaching (c).

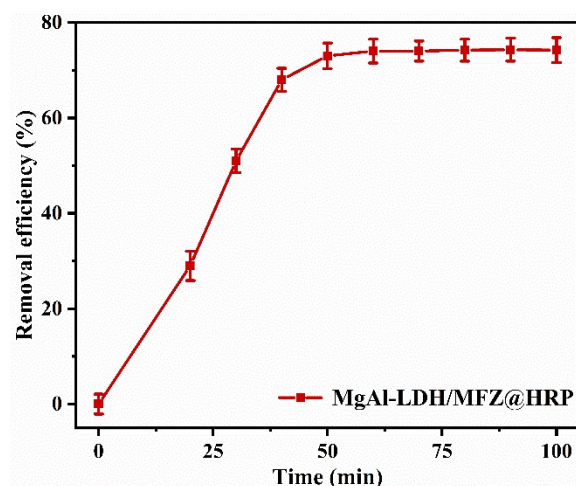

**Fig. S6** Effect of adding MgAl-LDH/MFZ@HRP micromotor on COD removal efficiency of catechol practical wastewater.

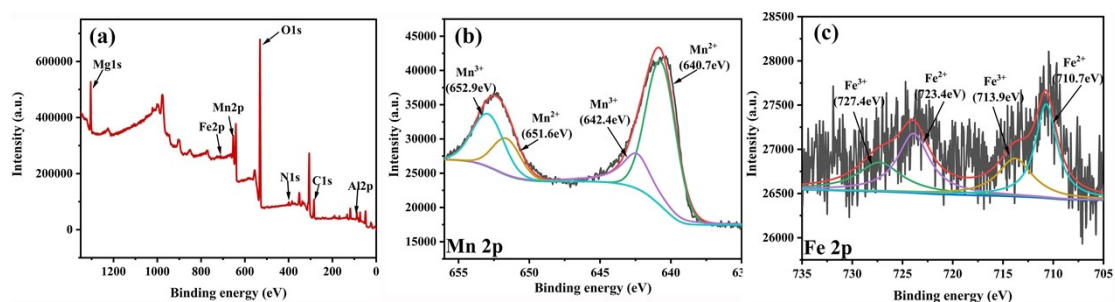

**Fig. S7** XPS plots of degraded MgAl-LDH/MFZ@HRP micromotors, full spectrum (a), Mn (b), Fe (c).

## 2. Table

**Table S1** Pore texture parameters of the obtained samples

| Sample                            | SBET ( $\text{m}^2 \text{g}^{-1}$ ) | VTotal ( $\text{cm}^3 \text{g}^{-1}$ ) | Dp (nm) |
|-----------------------------------|-------------------------------------|----------------------------------------|---------|
| Mn <sub>2</sub> O <sub>3</sub> /C | 44.929                              | 0.160341                               | 14.4125 |
| MgAl-LDH                          | 65.7686                             | 0.157659                               | 10.5368 |
| MgAl-LDH/MFZ@HRP                  | 110.6669                            | 0.25114                                | 8.6179  |

**Table S2** Comparison of speed with other reported micromotors

| <b>Micromotors</b>                     | <b>Concentration of H<sub>2</sub>O<sub>2</sub></b> | <b>Velocity (μm s<sup>-1</sup>)</b> | <b>Ref.</b> |
|----------------------------------------|----------------------------------------------------|-------------------------------------|-------------|
| CuS@Fe <sub>3</sub> O <sub>4</sub> /Pt | 5%                                                 | 423.8                               | 1           |
| Magnetic illite microspheres           | 5%                                                 | 100.38                              | 2           |
| MnO <sub>2</sub> microparticles        | 5%                                                 | 128                                 | 3           |
| Au/ Ni/Pt                              | 5%                                                 | 37.57                               | 4           |
| Fe-zeolite                             | 10%                                                | 84.96                               | 5           |
| rGO/ZnO/BiOI/Co-Pi/Pt                  | 5%                                                 | 63.1                                | 6           |
| PAPBA/Ni/Pt                            | 3%                                                 | 40                                  | 7           |
| MgAl-LDHs/MFZ                          | 3%                                                 | 128.33                              | This work   |

**Table S3** Comparison of various sensor platforms for the detection of catechol

| <b>Method</b>   | <b>System</b>                                      | <b>LOD (μM)</b> | <b>Linear(μM)</b> | <b>Ref.</b> |
|-----------------|----------------------------------------------------|-----------------|-------------------|-------------|
| Electrochemical | AuNP-MoS <sub>2</sub> -Lac/GCE                     | 2.0             | 2-2000            | 8           |
| Electrochemical | FYSSns-2-Lac/GCE                                   | 1.6             | 12.5-450          | 9           |
| Electrochemical | Fe <sub>3</sub> O <sub>4</sub> -GO-AuNPs           | 0.8             | 2-145             | 10          |
| Colorimetric    | TMB-δ-MnO <sub>2</sub>                             | 0.22            | 0.5-10            | 11          |
| Colorimetric    | Co <sub>1.5</sub> Mn <sub>1.5</sub> O <sub>4</sub> | 0.35            | 1-1000            | 12          |
| Colorimetric    | MgAl-LDH/MFZ@HRP                                   | 0.69            | 0-200             | This work   |

**Table S4** Comparison of COD before and after degradation of actual catechol wastewater

| <b>Actual water sample status</b> | <b>Testing Program</b> | <b>Test results (mg/L)</b> |
|-----------------------------------|------------------------|----------------------------|
| pre-degradation                   | CODCr                  | 192.23                     |
| after degradation                 |                        | 49.21                      |

## References

1. E. H. Ma, K. Wang, Z. Q. Hu and H. Wang, Dual-stimuli-responsive CuS-based micromotors for efficient photo-Fenton degradation of antibiotics, *J. Colloid Interface Sci.*, 2021, **603**, 685-694.
2. C. W. Park, T. Kim, H. M. Yang, Y. Lee and H. J. Kim, Active and selective

- removal of Cs from contaminated water by self-propelled magnetic illite microspheres, *J. Hazard. Mater.*, 2021, **416**, 8.
3. J. Tesar, M. Ussia, O. Alduhaish and M. Pumera, Autonomous self-propelled MnO<sub>2</sub> micromotors for hormones removal and degradation, *Appl. Mater. Today*, 2022, **26**, 5.
  4. Z. H. Li, Z. Z. Xie, H. Lu, Y. Wang and Y. S. Liu, Cargo Transportation and Methylene Blue Degradation by Using Fuel-Powered Micromotors, *ChemistryOpen*, 2021, **10**, 861-866.
  5. W. Ma, K. Wang, S. H. Pan and H. Wang, Iron-Exchanged Zeolite Micromotors for Enhanced Degradation of Organic Pollutants, *Langmuir*, 2020, **36**, 6924-6929.
  6. H. J. Zhou, B. Wu, L. Dekanovsky, S. Y. Wei, B. Khezri, T. Hartman, J. H. Li and Z. Sofer, Integration of BiOI nanosheets into bubble-propelled micromotors for efficient water purification, *FlatChem*, 2021, **30**, 6.
  7. F. Kuralay, S. Sattayasamitsathit, W. Gao, A. Uygun, A. Katzenberg and J. Wang, Self-Propelled Carbohydrate-Sensitive Microtransporters with Built-In Boronic Acid Recognition for Isolating Sugars and Cells, *J. Am. Chem. Soc.*, 2012, **134**, 15217-15220.
  8. Y. N. Zhang, X. Li, D. W. Li and Q. F. Wei, A laccase based biosensor on AuNPs-MoS<sub>2</sub> modified glassy carbon electrode for catechol detection, *Colloid Surf. B-Biointerfaces*, 2020, **186**, 7.
  9. Y. J. Zheng, D. D. Wang, Z. K. Li, X. F. Sun, T. T. Gao and G. W. Zhou, Laccase biosensor fabricated on flower-shaped yolk-shell SiO<sub>2</sub> nanospheres for catechol detection, *Colloid Surf. A-Physicochem. Eng. Asp.*, 2018, **538**, 202-209.
  10. S. Erogul, S. Z. Bas, M. Ozmen and S. Yildiz, A new electrochemical sensor based on Fe<sub>3</sub>O<sub>4</sub> functionalized graphene oxide-gold nanoparticle composite film for simultaneous determination of catechol and hydroquinone, *Electrochim. Acta*, 2015, **186**, 302-313.
  11. P. Y. Xiao, Y. Liu, W. J. Zong, J. Wang, M. H. Wu, J. J. Zhan, X. L. Yi, L. F. Liu and H. Zhou, Highly selective colorimetric determination of catechol based on the aggregation-induced oxidase-mimic activity decrease of  $\delta$ -MnO<sub>2</sub>, *RSC Adv.*, 2020,

**10**, 6801-6806.

12. X. X. Liu, J. Yang, J. Cheng, Y. Xu, W. Chen and Y. C. Li, Facile preparation of four-in-one nanozyme catalytic platform and the application in selective detection of catechol and hydroquinone, *Sens. Actuator B-Chem.*, 2021, **337**, 9.
